# Supplementary material for: Gene editing and scalable functional genomic screening in Leishmania species using the CRISPR/Cas9 cytosine base editor toolbox LeishBASEedit
Source: eLife. 2023 May 24;12:e85605. doi: 10.7554/eLife.85605 (PMC10208639; doi:10.7554/eLife.85605)
Supplement: Figure 2—figure supplement 1—source data 1. — As described in Figure 2—figure supplement 1, the LPG2 locus was amplified and Sanger sequenced. Sanger sequencing reads were then aligned to LPG2 reference sequences of each species. Shown are sequence identities. [file elife-85605-fig2-figsupp1-data1.xlsx]

## Sheet: Sheet1
Figure 2-figure supplement 1 - source data 1
		LPG2 Reference Sequence
		L. donovani BPK190	L. mexicana U1103	L. infantum LEM2259	L. major
					Friedlin
Sanger Sequencing Read	L. donovani BPK190	254/254 (100%)	234/254 (92%)	252/254 (99%)	237/254 (93%)
	L. mexicana U1103	234/254 (92%)	254/254 (100%)	232/254 (91%)	230/254 (91%)
	L. infantum LEM2259	252/254 (99%)	232/254 (91%)	254/254 (100%)	235/254 (93%)
	L. major Friedlin	237/254 (93%)	230/254 (91%)	235/254 (93%)	254/254 (100%)
