# Supplementary material for: Gene editing and scalable functional genomic screening in Leishmania species using the CRISPR/Cas9 cytosine base editor toolbox LeishBASEedit
Source: eLife journal article supplement (doi:10.7554/elife.85605), 2023-04-28
Supplement: supp6 [file elife-85605-supp6-v1.pdf]

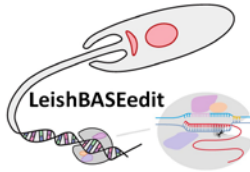

www.biozentrum.uni-wuerzburg.de/zeb/team/staff-scientists/tom-beneke/

**Dr. Tom Beneke**

Cell and Developmental Biology  
Biocenter, University of Wuerzburg  
Am Hubland • D-97074 Würzburg  
[tom.beneke@uni-wuerzburg.de](mailto:tom.beneke@uni-wuerzburg.de)

## Cloning guide target sequences into base editor plasmids for *Leishmania* editing Protocol version October 2022

### Workflow

Primer pairs given by LeishBASEedit can be used to clone guides into BbsI sites of base editor plasmids, such as pLdCH-hyBE4max. The general workflow is shown below. First, both oligos (primer sequences given by LeishBASEedit primer design) are annealed and phosphorylated, before they are being ligated into a dephosphorylated vector that was digested with BbsI. The resulting plasmid can be transfected into *Leishmania* species.

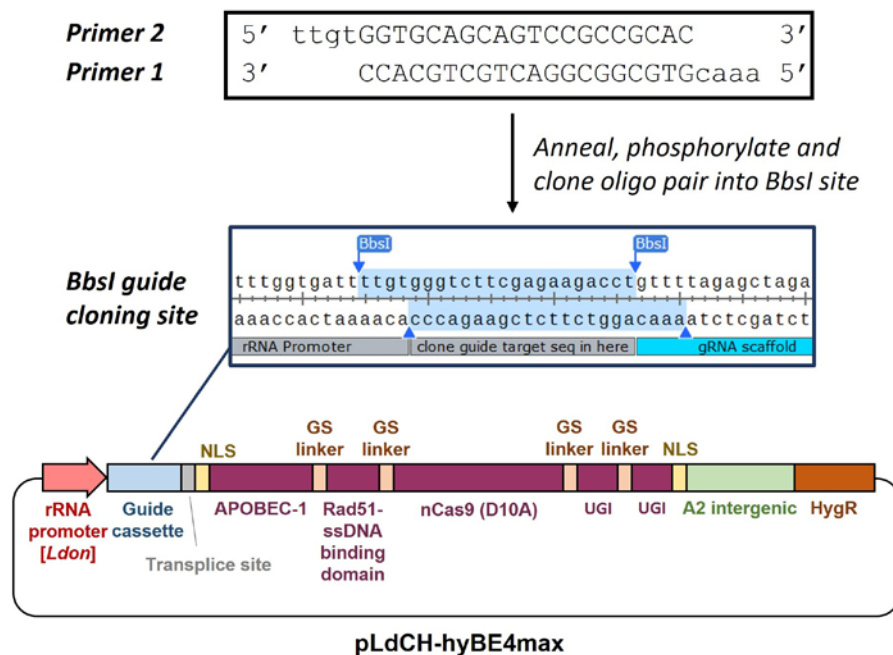

## Step-by-step protocol

### 1. Digest and Dephosphorylate base editor plasmid

- 5 µg plasmid
- 2 µl Bpil (BbsI) [ThermoFisher, ER1011]
- 2 µl FastAP [ThermoFisher, EF0651]
- 3 µl 10x Tango Buffer [ThermoFisher]
- 30 µl total volume with ddH<sub>2</sub>O
- Incubate at 37°C for at least 4 hours or better overnight
- PCR purify digested and dephosphorylated plasmid (confirm linearization of plasmid on gel)

### 2. Anneal and phosphorylate oligo pair

- Order standard desalted oligos (25 nmole scale)
- 1 µl oligo 1 (100 µM)
- 1 µl oligo 2 (100 µM)
- 1 µl T4 DNA Ligation Buffer (ATP needed for phosphorylation)
- 0.5 µl T4-Polynukleotid-Kinase [ThermoFisher, EK0031]
- 6.5 µl ddH<sub>2</sub>O
- Phosphorylate at 37°C for 30 minutes, followed by 5 minutes at 95°C
- Then anneal by ramping down from 95°C to 25°C at 5°C/minute
- Dilute (1:200) annealed and phosphorylated oligo pair by mixing 1 µl with 199 µl ddH<sub>2</sub>O

### 3. Ligation and transformation

- 50ng digested and dephosphorylated plasmid (from Step 1)
- 1 µl diluted oligo pair (from Step 2)
- 1 µl T4 DNA Ligation Buffer
- 0.5 µl T4 DNA Ligase [ThermoFisher, EL0014]
- 10 µl total volume with ddH<sub>2</sub>O
- Incubate at 37°C for 2 hours
- Transform entire volume into 50-100 µl competent cells (e.g. TOP10, Stbl3, XL1Blue)
- Spread out on AmpR plate and compare to “no-insert” control
