# Supplementary material for: Gene editing and scalable functional genomic screening in Leishmania species using the CRISPR/Cas9 cytosine base editor toolbox LeishBASEedit
Source: eLife. 2023 May 24;12:e85605. doi: 10.7554/eLife.85605 (PMC10208639; doi:10.7554/eLife.85605)
Supplement: Supplementary file 1. — Sheet contains histogram data of mean velocity of tracked cells (average values given). STDEV: standard deviation between duplicates (14 days post transfection) and triplicates (28 and 42 days post transfection). [file elife-85605-supp1.xlsx]

## Sheet: Sheet1
	L. donovani 14 days post transfection																		L. infantum 14 days post transfection																		L. major 14 days post transfection
BIN [µm/sec]	Ldon_14D_PF16-1	STDEV	Ldon_14D_PF16-2	STDEV	Ldon_14D_PF16-3	STDEV	Ldon_14D_PF16-4	STDEV	Ldon_14D_MFT-1	STDEV	Ldon_14D_MFT-2	STDEV	Ldon_14D_MFT-3	STDEV	Ldon_14D_MFT-4	STDEV	Ldon_14D_WT	STDEV	Linf_14D_PF16-1	STDEV	Linf_14D_PF16-2	STDEV	Linf_14D_PF16-3	STDEV	Linf_14D_PF16-4	STDEV	Linf_14D_IFT88-1	STDEV	Linf_14D_IFT88-2	STDEV	Linf_14D_IFT88-3	STDEV	Linf_14D_IFT88-4	STDEV	Linf_14D_WT	STDEV	Lmaj_14D_PF16-1	STDEV	Lmaj_14D_PF16-2	STDEV	Lmaj_14D_PF16-3	STDEV	Lmaj_14D_PF16-4	STDEV	Lmaj_14D_IFT88-1	STDEV	Lmaj_14D_IFT88-2	STDEV	Lmaj_14D_IFT88-3
0.01	0.01	0	0.01	0	1.28717	0.259392	0.309414	0.423435	0.01	0	0.01	0	0.34269	0.173136	0.0832473	0.103587	0.268607	0.206132	0.01	0	0.01	0	2.29378	1.59562	0.01	0	0.414123	0.125002	0.171996	0.0176863	0.01	0	0.345622	0.184652	0.517821	0.718167	0.01	0	0.264067	0.359306	0.20185	0.271317	0.226239	0.305808	0.19297	0.258759	0.01	0	0.169474
0.1	6.66791	1.65167	11.7548	7.05914	11.0594	5.5884	2.80513	1.19902	0.642055	0.138013	2.93502	0.411236	2.56992	1.6611	0.395204	0.337587	2.56322	2.23506	1.13334	0.687438	1.11611	1.56428	12.3096	3.56289	0.591234	0.0170891	5.10683	1.29998	1.01947	0.137121	1.04106	0.535723	2.11214	0.966705	1.31466	1.04174	0.590938	0.82157	1.79072	0.334195	1.12708	1.03716	0.531316	0.737252	1.48026	1.62821	3.41373	1.56418	1.01377
0.3	21.7724	8.10007	25.2606	5.95099	54.1496	0.717345	14.7245	5.222	3.34451	1.1734	11.8758	2.85672	11.424	5.96053	2.92193	1.91907	12.5791	7.01784	7.08305	3.15184	5.71326	0.5373	44.2226	3.39054	5.81276	1.60802	20.5575	0.409343	9.60675	0.503956	9.58451	2.36706	8.14516	0.266115	3.68756	2.76261	8.37878	1.40887	8.32341	5.08224	4.25838	0.102292	4.08477	3.89946	9.16353	2.85767	3.02912	2.10811	6.45193
0.7	14.3396	0.226907	14.1911	2.47617	21.9436	2.93595	11.4124	2.8027	6.89414	1.80006	15.9042	2.77447	14.0431	5.06008	11.5926	4.00071	15.2426	6.96241	12.869	1.02282	17.0609	10.4419	27.8462	2.81522	18.5785	4.30358	24.801	2.82798	20.3096	2.62964	18.8469	4.56536	16.4593	1.0536	6.86231	4.79998	18.0998	0.919476	19.9464	6.23088	15.3159	0.61116	13.6167	1.39314	18.2801	6.7122	5.54107	3.04231	14.3004
1	3.93284	2.92341	4.81243	1.39254	5.98218	1.59193	4.87496	0.854885	4.00335	1.26832	6.35856	0.833439	6.27805	2.95853	11.1756	1.23671	5.8795	0.670469	9.59213	3.03881	12.4444	1.88562	4.50823	1.53609	11.9151	3.62557	9.84592	1.94718	10.412	1.19164	12.3558	3.13075	8.60215	2.73719	6.83415	0.962093	14.419	7.13335	15.6998	1.68583	10.9678	1.59135	11.2785	0.319466	9.75094	1.56175	4.87397	2.89788	6.09606
1.5	4.92537	0.105538	3.60932	1.04441	2.51347	1.12824	6.53854	0.439507	4.81695	0.117701	7.06033	1.91362	5.64799	0.423062	15.4248	1.86699	5.37283	0.996344	10.1581	1.09323	14.1792	3.83206	4.98019	2.09825	12.5004	0.613767	7.51245	0.201199	13.0233	4.58866	9.34585	1.45582	10.7834	1.78134	7.31436	0.534496	10.7527	1.91866	13.6956	4.07965	14.8151	1.87621	15.8291	4.52193	9.30451	3.5887	9.15906	3.36498	12.0651
3	10.2239	0.316615	10.3402	1.09017	1.39755	0.103298	8.50545	1.96294	10.7228	1.77538	13.5817	2.54966	11.5347	0.197042	20.7942	1.52151	13.3946	1.55811	19.2216	4.85376	15.7563	1.54094	1.95654	0.459384	19.936	2.38383	9.8065	2.02415	16.6211	0.499378	14.8883	2.9832	11.2135	2.38961	15.4632	0.614146	20.1683	0.900938	19.6296	12.3726	22.4547	1.13298	23.3582	3.26053	20.0893	1.89404	18.1921	2.55677	22.3673
6	13.209	4.53815	11.0556	0.604742	0.355473	0.190527	14.0053	1.07952	20.7701	3.22291	16.2453	0.537349	16.8098	3.52503	14.4729	3.43444	17.348	3.43777	17.8072	2.29949	18.3584	6.47801	0.539764	0.225618	13.7734	2.27862	6.67725	1.15203	12.2539	0.413235	12.1737	0.578467	12.1313	2.00401	16.843	0.113187	13.6024	1.2031	9.70802	3.47068	15.2619	2.09633	15.7697	0.400156	15.2726	7.6426	22.399	5.31022	19.0239
8	6.85821	0.200523	4.3224	1.33043	0.127549	0.166239	8.2139	1.29899	9.47605	0.824663	7.56824	0.175461	8.76908	3.05633	7.3137	2.0506	8.06026	3.19492	7.85019	3.08606	5.04659	1.48011	0.496778	0.372897	4.65752	1.94548	3.31298	1.00002	5.34437	0.791514	4.8086	1.80537	5.6874	1.04817	8.27924	3.00575	4.833	0.758197	4.17834	0.779788	6.76341	1.01385	5.14905	1.65003	6.01504	1.06332	9.80226	0.279647	7.23099
10	4.36194	1.21897	3.59776	2.35522	0.127549	0.166239	6.51389	0.601905	8.72956	1.25769	5.47457	1.77654	7.06178	2.51084	4.79987	0.736728	5.49636	2.30369	5.46362	0.861614	4.07168	3.87261	0.2381	0.322582	3.71032	1.15197	2.56153	0.167634	4.44688	0.0266335	3.85104	2.01213	5.33026	0.543093	5.61286	2.21554	4.80285	2.04658	1.45288	0.14358	4.18696	1.31684	3.69585	1.47218	3.90038	0.863946	8.16167	2.83949	5.64303
12	3.6791	0.453815	4.08085	1.67203	0.232924	0.0172163	6.13446	2.64834	8.11797	0.444035	4.26101	1.11308	4.68753	2.57966	4.09564	0.259197	4.48301	1.65193	3.72299	0.684659	1.3405	0.638677	0.01	0	2.76618	2.27388	2.40562	1.09878	1.64021	0.289639	3.43641	1.73793	5.74501	2.65029	6.16274	4.364	1.5675	2.20264	1.97101	0.876333	1.87878	0.68367	2.4639	0.981452	1.76222	0.166144	4.46545	0.875817	2.54788
16	5.60821	1.56724	3.85087	1.386	0.465849	0.0344325	7.77339	4.10513	10.905	3.61549	4.84646	3.34472	5.58703	2.29424	4.09961	1.15008	5.80348	2.73803	3.07509	2.05861	2.27957	1.33818	0.613328	0.20807	3.58366	2.61093	2.96174	1.10901	2.66748	1.96797	3.70485	3.36632	4.94624	2.43306	9.8503	1.60139	1.39734	0.871278	1.30034	1.82481	1.48508	0.126893	2.02725	0.26183	2.56109	2.22632	5.39113	4.36065	1.72551
30	4.42164	2.71761	3.12392	0.318715	0.372647	0.51286	8.19358	5.77564	11.5775	5.59324	3.8888	1.63946	5.24434	2.1211	2.83575	0.247973	3.50852	3.2038	2.02364	0.573483	2.63799	1.84507	0.01	0	2.17494	2.25679	4.03661	0.970888	2.48298	1.70704	5.96295	5.62319	8.49846	3.80708	11.2628	2.8737	1.39734	0.871278	2.04978	0.0321817	1.28823	0.151495	1.97951	0.92217	2.23214	1.03009	5.57149	5.70356	1.36964
BIN/DATA Median	5.03497		4.01127		0.72526		7.11566		9.56237		5.30787		6.07474		4.98887		5.44266		4.72608		4.17689		0.716882		4.18066		3.64113		3.94611		5.16637		6.47221		8.63104		3.5769		3.23928		3.85169		4.10066		4.07518		6.79735		4.31038
Right skewed data?	TRUE		TRUE		TRUE		FALSE		FALSE		FALSE		FALSE		FALSE		FALSE		FALSE		TRUE		TRUE		FALSE		TRUE		FALSE		FALSE		FALSE		FALSE		FALSE		FALSE		FALSE		FALSE		FALSE		FALSE		FALSE
Left skewed data?	FALSE		FALSE		FALSE		FALSE		FALSE		FALSE		FALSE		FALSE		FALSE		FALSE		FALSE		FALSE		FALSE		FALSE		FALSE		FALSE		FALSE		FALSE		FALSE		FALSE		FALSE		FALSE		FALSE		FALSE		FALSE
Cramer-von Mises Test (p-value)	0.03137		0.01234		7.201e-06		0.4022		0.7055		0.1498		0.3532		0.1728		0.06838		0.6183		0.02915		2.106e-05		0.0554		0.008392		0.2399		0.4502		0.8041		0.5069		0.1422		0.03026		0.04903		0.02622		0.1363		0.01265		0.08397
Significance level based on WT	0.05		0.05		0.05		0.05		0.05		0.05		0.05		0.05		0.05		0.05		0.05		0.05		0.05		0.05		0.05		0.05		0.05		0.05		0.01		0.01		0.01		0.01		0.01		0.01		0.01
Significantly right skewed?	*		*		*		ns		ns		ns		ns		ns		ns		ns		*		*		ns		*		ns		ns		ns		ns		ns		ns		ns		ns		ns		ns		ns
Percentage of population up to 1 µm/sec	46.7227		56.029		94.422		34.1265		14.894		37.0835		34.6578		26.1686		36.533		30.6875		36.3447		91.1803		36.9076		60.7253		41.5198		41.8382		35.6644		19.2165		41.4986		46.0245		31.871		29.7375		38.8678		16.8679		28.0317
[truncated: 115 more columns]
